# Supplementary material for: Effects of short-term water velocity stimulation on the biochemical and transcriptional responses of grass carp (Ctenopharyngodon idellus)
Source: Front Physiol. 2023 Aug 31;14:1248999. doi: 10.3389/fphys.2023.1248999 (PMC10501314; doi:10.3389/fphys.2023.1248999)
Supplement: Supplementary file 4 [file Table4.XLSX]

## Sheet: S4.KEGG-Enrichment ZS vs. NS
Table S4. KEGG pathways enrichment analysis of the differentially expressed genes in ZS vs. NS group.
ID	Description	Up/Down	pvalue	p.adjust	geneID
ko04060	Cytokine-cytokine receptor interaction	up	0.00186061	0.204312	Bmp7/cxcl11.6/Tnfrsf14/Cluster-11240.480/pdgfra
ko02010	ABC transporters	up	0.00343381	0.204312	ABCB11/ABCC2/ABCG5
ko04976	Bile secretion	up	0.0110423	0.34678	ABCB11/ABCC2/ABCG5
ko05412	Arrhythmogenic right ventricular cardiomyopathy (ARVC)	up	0.0116565	0.34678	ITGA2B/jup/CACNA2D4
ko04514	Cell adhesion molecules (CAMs)	up	0.0405741	0.642736	NRXN2/Tnfrsf14/Nrxn2
ko04623	Cytosolic DNA-sensing pathway	up	0.0418669	0.642736	cxcl11.6/caspa
ko05134	Legionellosis	up	0.0418669	0.642736	Rab1A/caspa
ko04974	Protein digestion and absorption	down	1.10927e-05	0.00266224	MME/slc38a2/Col4a1/COL1A1/col1a2/fxyd2/Col5a2/Slc7a9/COL6A2/COL6A3/COL6A1
ko04510	Focal adhesion	down	0.00114487	0.137384	LAMA1/JUN/Col4a1/COL1A1/col1a2/kdr/ACTN4/TLN2/Arhgap35/COL6A2/SOS2/COL6A3/vegfaa/COL6A1/igf2
ko04320	Dorso-ventral axis formation	down	0.00236592	0.189273	ETS2/Cluster-11240.21164/notch1/SOS2/NOTCH1
ko04512	ECM-receptor interaction	down	0.00318369	0.191021	LAMA1/Col4a1/COL1A1/col1a2/COL6A2/COL6A3/COL6A1
ko05224	Breast cancer	down	0.00456288	0.218426	fos/JUN/ncoa3/notch1/Lrp5/fgfr1a/SOS2/wnt10b/igf2/PGR/NOTCH1
ko05206	MicroRNAs in cancer	down	0.00546945	0.218426	timp3/vim/notch1/CREBBP/ezh2/MMP2/EP300/ABCC1/SOS2/vegfaa/NOTCH1
ko04013	MAPK signaling pathway - fly	down	0.00637075	0.218426	JUN/Map3k5/ETS2/Tnik/Strn/Strn4/Cic/SOS2
ko05168	Herpes simplex infection	down	0.00955737	0.256907	Mr1/fos/SOCS3/CD74/JUN/NECTIN1/PER2/c3/CREBBP/EP300/HCFC1
ko00140	Steroid hormone biosynthesis	down	0.00963402	0.256907	HSD17B1/cyp19a1a/cyp17a1/HSD3B
ko04913	Ovarian steroidogenesis	down	0.01071	0.257039	HSD17B1/cyp19a1a/cyp17a1/HSD3B/igf2
ko00720	Carbon fixation pathways in prokaryotes	down	0.0122785	0.267895	PC/Aco1/ACLY
ko00760	Nicotinate and nicotinamide metabolism	down	0.0146406	0.292811	Nampt/NNMT/NAMPT/NT5M
ko01522	Endocrine resistance	down	0.0186665	0.344613	fos/JUN/ncoa3/notch1/MMP2/SOS2/igf2/NOTCH1
ko04520	Adherens junction	down	0.02222	0.376444	NECTIN1/CREBBP/fgfr1a/ACTN4/EP300/Ptprm/PTPRJ
ko04940	Type I diabetes mellitus	down	0.0247874	0.376444	Mr1/GAD1/Ptprn
ko05211	Renal cell carcinoma	down	0.0260569	0.376444	JUN/CREBBP/EP300/SOS2/vegfaa/HIF1A
ko04933	AGE-RAGE signaling pathway in diabetic complications	down	0.0266648	0.376444	JUN/Col4a1/COL1A1/col1a2/MMP2/vegfaa/Vcam1
ko04657	IL-17 signaling pathway	down	0.0317866	0.423821	fos/JUN/Jund/Cluster-11240.19144/ANAPC5/MMP2
ko04668	TNF signaling pathway	down	0.0353574	0.4464	fos/SOCS3/JUN/Map3k5/MMP2/Casp7/Vcam1
ko04330	Notch signaling pathway	down	0.0372	0.4464	notch1/CREBBP/EP300/NCOR2/NOTCH1
ko04919	Thyroid hormone signaling pathway	down	0.0406605	0.459927	gata4/ncoa3/notch1/CREBBP/fxyd2/EP300/rxrbb/NOTCH1
ko05020	Prion diseases	down	0.04216	0.459927	notch1/C6/NOTCH1
ko04214	Apoptosis - fly	down	0.0488309	0.50954	BIRC6/JUN/Map3k5/PARP4/Casp7
